# Supplementary material
Source: PubMed Central journal article supplement (PMC4947894)
Supplement: rspb20161063supp1.pdf [file rspb20161063supp1.pdf]

## Supplementary Material

Visual pigments in a palaeognath bird, the emu *Dromaius novaehollandiae*: implications for spectral sensitivity and the origin of ultraviolet vision

Nathan S. Hart<sup>1,2\*</sup>, Jessica K. Mountford<sup>2,3,4</sup>, Wayne I. L. Davies<sup>2,3,4</sup>, Shaun P. Collin<sup>2,3,4</sup> and David M. Hunt<sup>2,4</sup>

<sup>1</sup>Department of Biological Sciences, Macquarie University, North Ryde, NSW 2109, Australia

<sup>2</sup>School of Animal Biology, University of Western Australia, Crawley, WA 6009, Australia

<sup>3</sup>Oceans Institute, University of Western Australia, Crawley, WA 6009, Australia

<sup>4</sup>Lions Eye Institute, University of Western Australia, Nedlands, WA 6009, Australia

\*Corresponding author: [nathan.hart@mq.edu.au](mailto:nathan.hart@mq.edu.au)

**Running title:** Emu photoreceptors and visual pigments

**Key words:** Spectral tuning, opsin evolution, microspectrophotometry, oil droplets, Casuariiformes

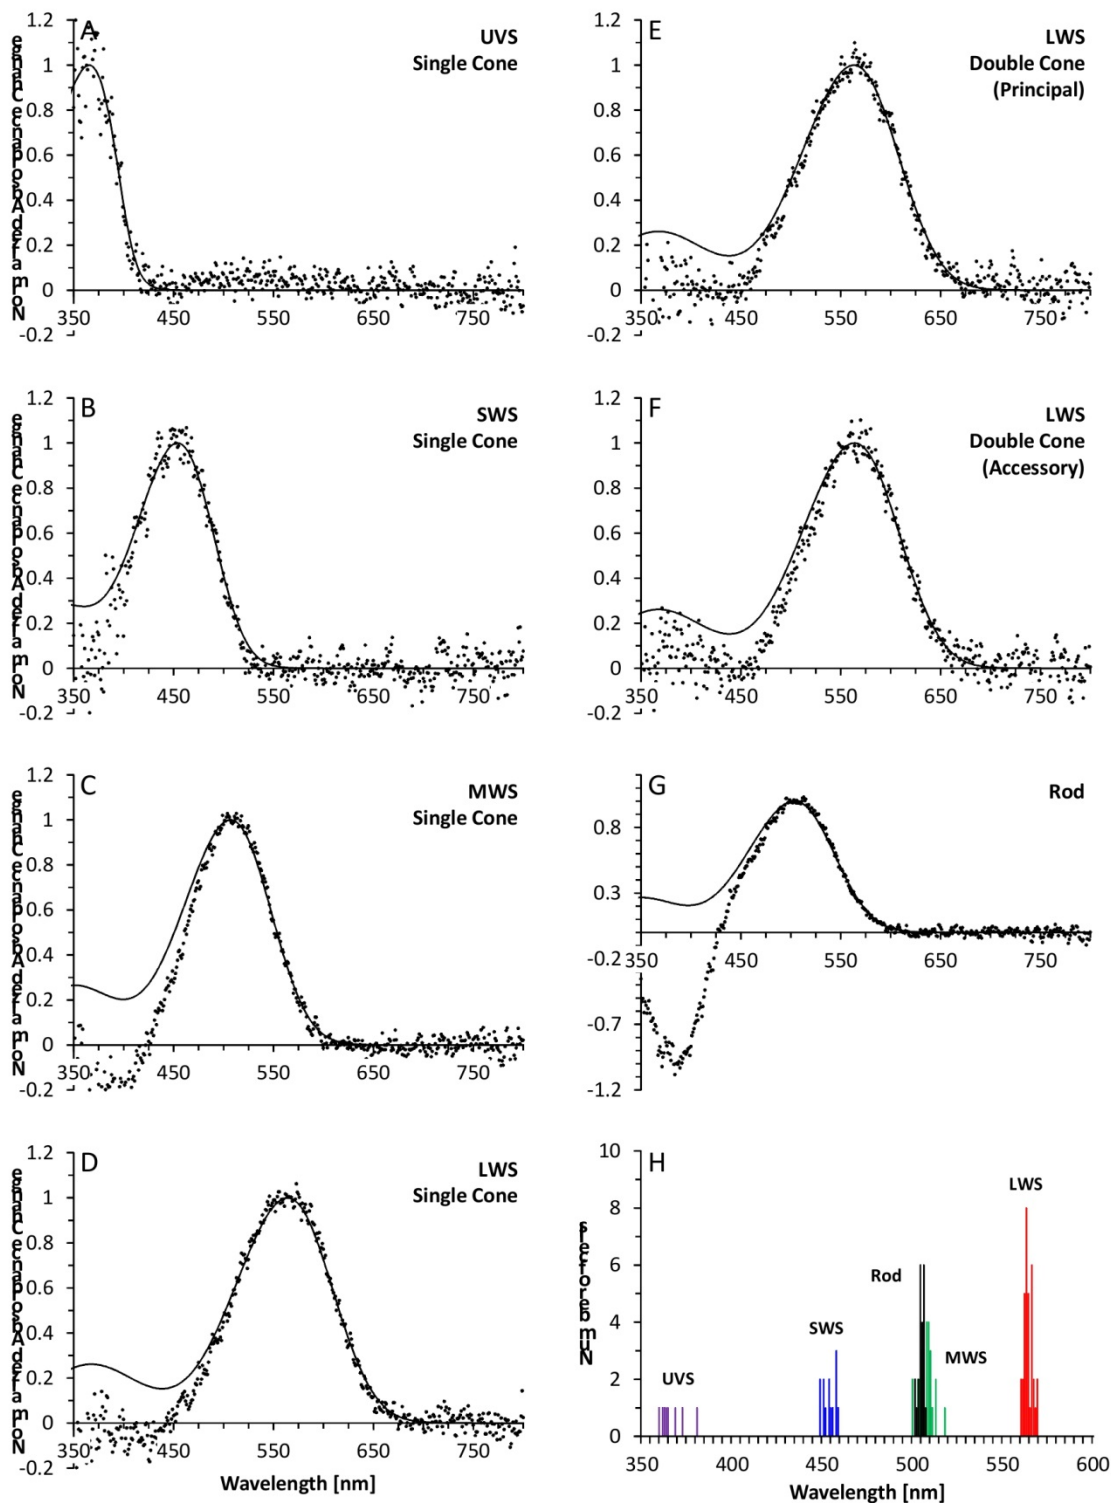

**Figure S1.** (a–g) Normalised mean bleaching difference spectra (black circles) of visual pigments measured using microspectrophotometry from emu photoreceptor outer segments. Difference spectra are overlaid with best-fit rhodopsin (vitamin A1) templates (black line). (h) Histogram shows the spectral distribution of the wavelength of maximum absorbance change ( $\lambda_{max}$ ) values for individual photoreceptor cell outer segments that were used to generate the mean spectra. The  $\lambda_{max}$  value distribution of long-wavelength-sensitive (LWS) pigments includes measurements from LWS single cones as well as both the principal and accessory members of double cones. UVS, ultraviolet-sensitive; SWS, short-wavelength-sensitive; MWS, medium-wavelength-sensitive.

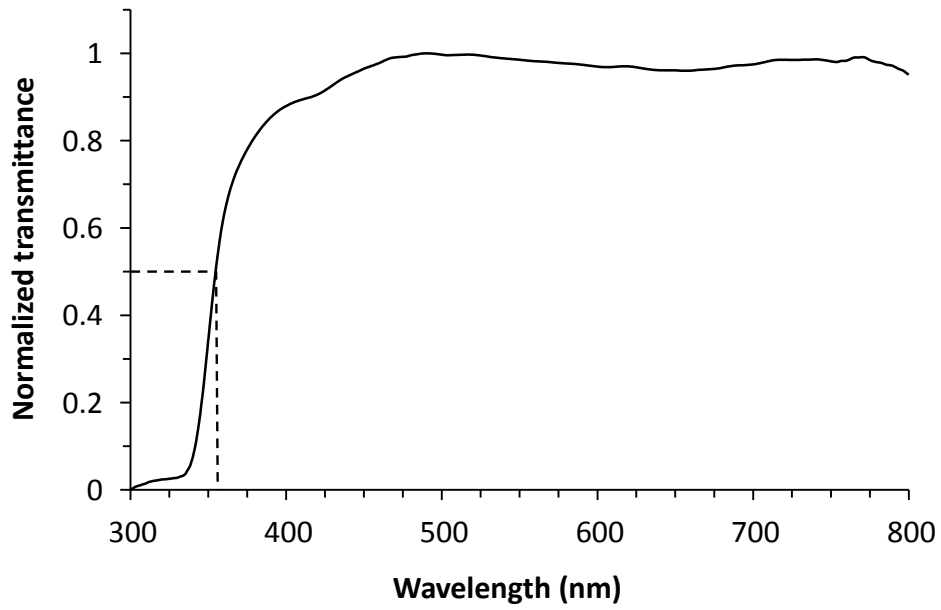

**Figure S2.** Normalised mean spectral transmittance of the combined ocular media (cornea, aqueous humour and lens) of the emu ( $n = 2$  eyes from different birds). The wavelength at 0.5 normalised transmittance ( $\lambda_{T0.5}$ ) is 355 nm and is indicated by the dashed line.

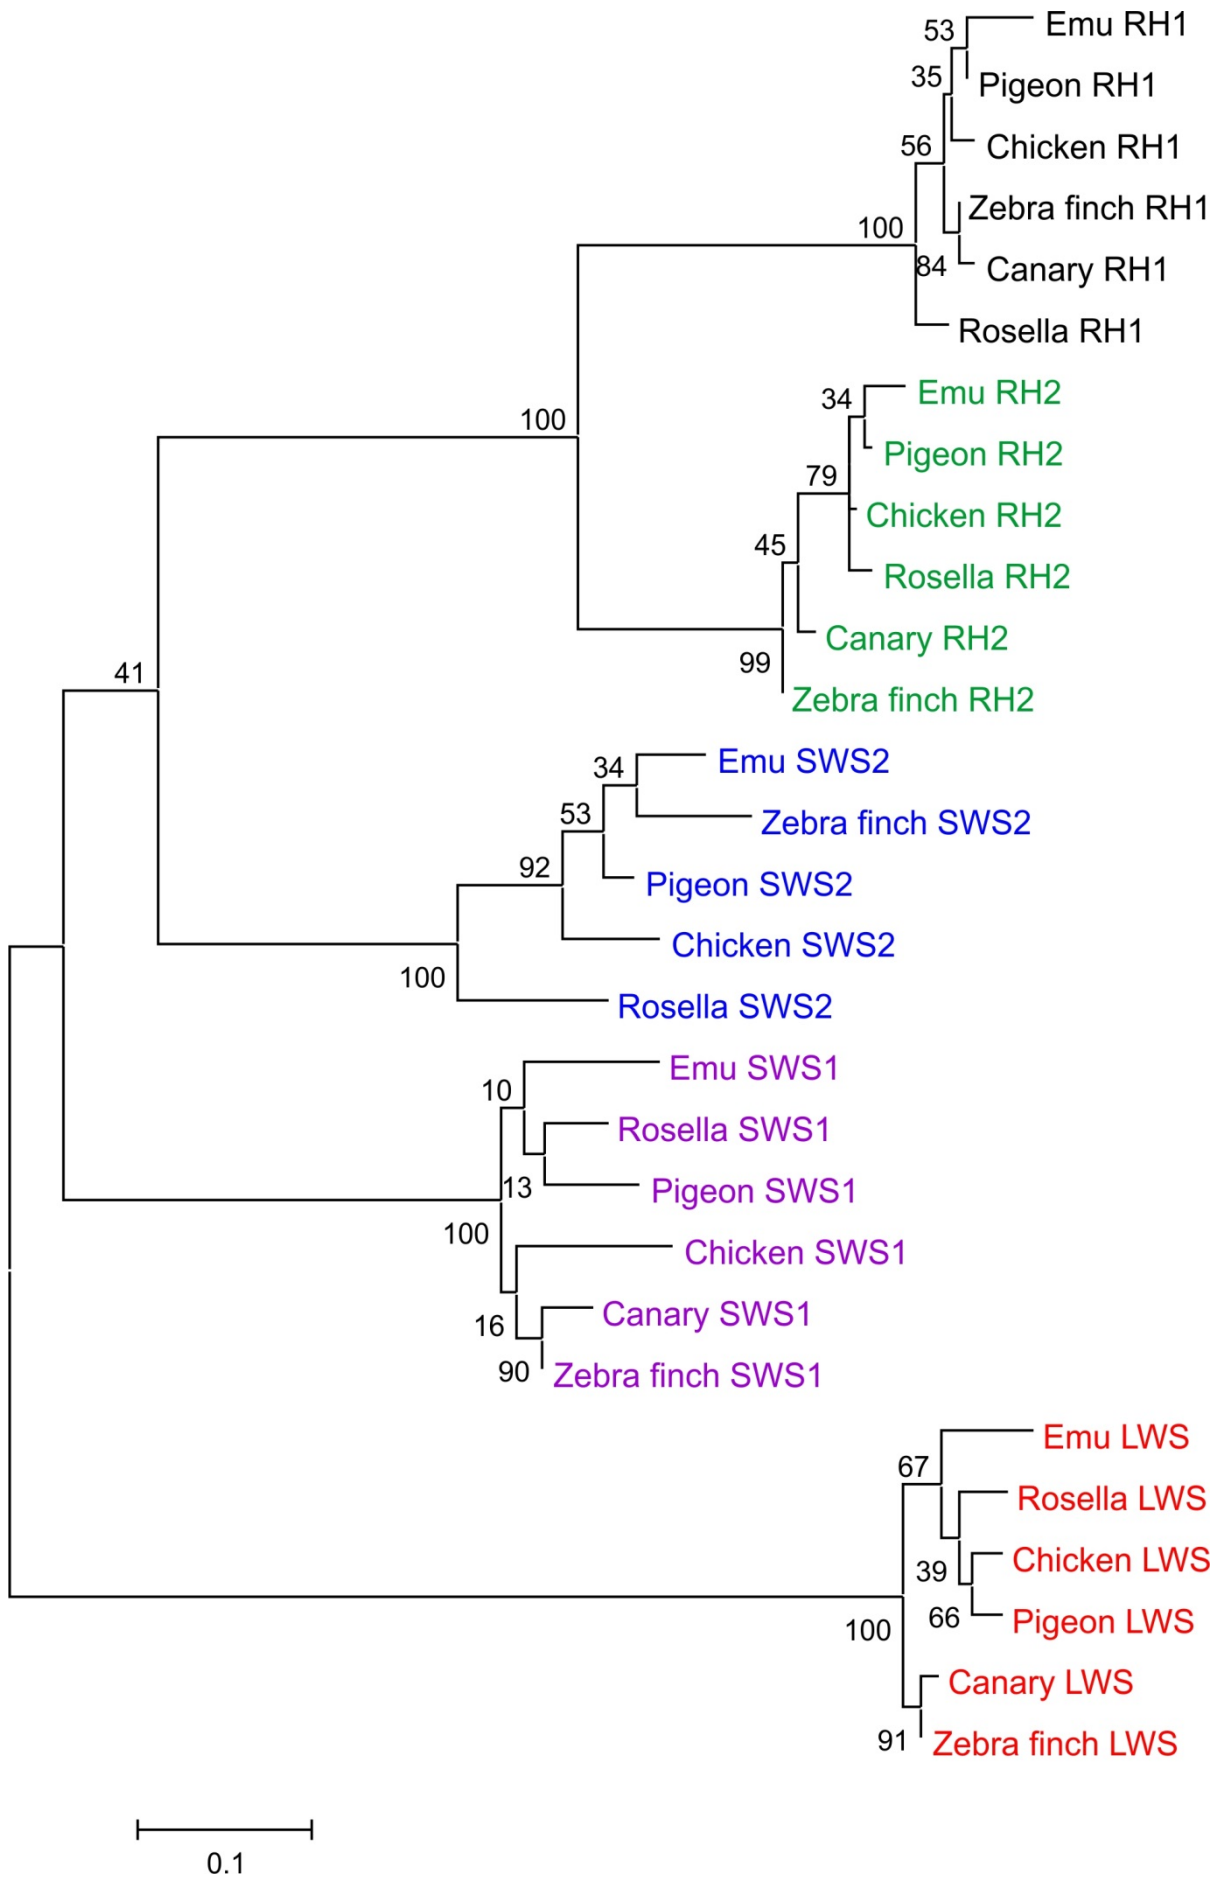

**Figure S3.** Maximum Likelihood phylogenetic analysis of emu (*Dromaius novaehollandiae*) LWS, SWS1, SWS2, RH2 and RH1 visual opsins compared to orthologues present in other representative birds with *Drosophila* RH1 opsin (GenBank accession no. X65877) as an outgroup (not shown). The degree of support for internal branching is expressed as a percentage with the scale bar indicating the number of amino acid substitutions per site. The

sequences used for generating the tree are as follows: (1) RH1 opsin class: emu (*Dromaius novaehollandiae*), KU568456; pigeon (*Columba livia*), AH007730; chicken (*Gallus gallus*), NM001030606; zebra finch (*Taeniopygia guttata*), NM001076695; canary (*Serinus canaria*), AJ277926; crimson rosella (*Platycercus elegans*), KF134487; (2) RH2 opsin class: emu (*Dromaius novaehollandiae*), KU568455; pigeon (*Columba livia*), AH007731; chicken (*Gallus gallus*), M92038; crimson rosella (*Platycercus elegans*), KF134489; canary (*Serinus canaria*), AJ277924; zebra finch (*Taeniopygia guttata*), NM001076696; (3) SWS2 opsin class: emu (*Dromaius novaehollandiae*), KU568454; zebra finch (*Taeniopygia guttata*), NM001076697; pigeon (*Columba livia*), AH007799; chicken (*Gallus gallus*), NM205517; crimson rosella (*Platycercus elegans*), KF134491; (4) SWS1 opsin class: emu (*Dromaius novaehollandiae*), KU568453; crimson rosella (*Platycercus elegans*), KF134492; pigeon (*Columba livia*), AH007798; chicken (*Gallus gallus*), NM205438; canary (*Serinus canaria*), AJ277922; zebra finch (*Taeniopygia guttata*), NM001076704; and (5) LWS opsin class: emu (*Dromaius novaehollandiae*), KU568452; crimson rosella (*Platycercus elegans*), KF134493; chicken (*Gallus gallus*), NM205440; pigeon (*Columba livia*), AH007800; canary (*Serinus canaria*), AJ277925; zebra finch (*Taeniopygia guttata*), NM001076702.

**SWS1 sequences**

Zebra finch M-DEEEFYLFKNGSSVGPWDGQYHIAPMWAFYLTQIFMGLVFAVGTPLNAIVLIVTIKY  
 Canary M-DEEEFYLFKNGSSVGPWDGQYHIAPMWAFYLTQIFMGLVFAVGTPLNAIVLIVTIKY  
 Chicken MSSDDDFYLFPTNGSSVGPWDGQYHIAPMWAFYLTQIFMGLVFAVGTPLNAIVLIVTIKY  
 Pigeon MSGDEEFYLFKNGSSVGPWDGQYHIAPMWAFYLTQIFMGLVFAVGTPLNAIVLIVTIKY  
 Rosella MSGDEEFYLFKNGSSVGPWDGQYHIAPMWAFYLTQIFMGLVFAVGTPLNAIVLIVTIKY  
 Emu -----SSVGPWDGQYHIAPMWAFYLTQIFMGLVFAVGTPLNAIVLIVTIKY

86 93

Zebra finch KKLRLQPLNLYLVNLSVSGIMCCVFCIPTVFVASSQGYFVFGHMCFAFBGAGATGGVLTG  
 Canary KKLRLQPLNLYLVNLSVSGIMCCVFCIPTVFVASSQGYFVFGHMCFAFBGAGATGGVLTG  
 Chicken KKLRLQPLNLYLVNLSVSGIMCCVFCIPTVFVASSQGYFVFGHMCFAFBGAGATGGVLTG  
 Pigeon KKLRLQPLNLYLVNLSVSGIMCCVFCIPTVFVASSQGYFVFGHMCFAFBGAGATGGVLTG  
 Rosella KKLRLQPLNLYLVNLSVSGIMCCVFCIPTVFVASSQGYFVFGHMCFAFBGAGATGGVLTG  
 Emu -----KKLRLQPLNLYLVNLSVSGIMCCVFCIPTVFVASSQGYFVFGHMCFAFBGAGATGGVLTG

Zebra finch WSLAFLAFERYIVICKPFGNFRFNSRHALLVVAATWIIIGVGVATIPFFGWSRYIEEGLQC  
 Canary WSLAFLAFERYIVICKPFGNFRFNSRHALLVVAATWIIIGVGVATIPFFGWSRYIEEGLQC  
 Chicken WSLAFLAFERYIVICKPFGNFRFNSRHALLVVAATWIIIGVGVATIPFFGWSRYIEEGLQC  
 Pigeon WSLAFLAFERYIVICKPFGNFRFNSRHALLVVAATWIIIGVGVATIPFFGWSRYIEEGLQC  
 Rosella WSLAFLAFERYIVICKPFGNFRFNSRHALLVVAATWIIIGVGVATIPFFGWSRYIEEGLQC  
 Emu -----WSLAFLAFERYIVICKPFGNFRFNSRHALLVVAATWIIIGVGVATIPFFGWSRYIEEGLQC

Zebra finch SOGPDWYTVGTYKYS EYTWLFLIFCFIIVPLLSLII FSYQLLSALRAVAQQQSATTQK  
 Canary SOGPDWYTVGTYKYS EYTWLFLIFCFIIVPLLSLII FSYQLLSALRAVAQQQSATTQK  
 Chicken SOGPDWYTVGTYKYS EYTWLFLIFCFIIVPLLSLII FSYQLLSALRAVAQQQSATTQK  
 Pigeon SOGPDWYTVGTYKYS EYTWLFLIFCFIIVPLLSLII FSYQLLSALRAVAQQQSATTQK  
 Rosella SOGPDWYTVGTYKYS EYTWLFLIFCFIIVPLLSLII FSYQLLSALRAVAQQQSATTQK  
 Emu -----SOGPDWYTVGTYKYS EYTWLFLIFCFIIVPLLSLII FSYQLLSALRAVAQQQSATTQK

Zebra finch AEREVSRLVVMVGSFCMCFVYAAALAMVNNRHGLDLRLVITPAF FSKSSCVYNIIP  
 Canary AEREVSRLVVMVGSFCMCFVYAAALAMVNNRHGLDLRLVITPAF FSKSSCVYNIIP  
 Chicken AEREVSRLVVMVGSFCMCFVYAAALAMVNNRHGLDLRLVITPAF FSKSSCVYNIIP  
 Pigeon AEREVSRLVVMVGSFCMCFVYAAALAMVNNRHGLDLRLVITPAF FSKSSCVYNIIP  
 Rosella AEREVSRLVVMVGSFCMCFVYAAALAMVNNRHGLDLRLVITPAF FSKSSCVYNIIP  
 Emu -----A

Zebra finch YCFMKNQFRACIMETVCGRPMTDDSDVSSAQRTEVSSVSSSQVGPS----  
 Canary YCFMKNQFRACIMETVCGRPMTDDSDVSSAQRTEVSSVSSSQVGPS----  
 Chicken YCFMKNQFRACIMETVCGRPMTDDSDVSSAQRTEVSSVSSSQVGPS----  
 Pigeon YCFMKNQFRACIMETVCGRPMTDDSDVSSAQRTEVSSVSSSQVGPS----  
 Rosella YCFMKNQFRACIMETVCGRPMTDDSDVSSAQRTEVSSVSSSQVGPS----  
 Emu -----YCFMKNQFRACIMETVCGRPMTDDSDVSSAQRTEVSSVSSSQVGPS----

**RH2 sequences**

Zebra finch MNGTBEINFEVPMNKTGVVRSPEEYPCYLAEPWKYRACVCIIFFLISGTFINFLITLL  
 Canary MNGTBEINFEVPMNKTGVVRSPEEYPCYLAEPWKYRACVCIIFFLISGTFINFLITLL  
 Chicken MNGTBEINFEVPMNKTGVVRSPEEYPCYLAEPWKYRACVCIIFFLISGTFINFLITLL  
 Pigeon MNGTBEINFEVPMNKTGVVRSPEEYPCYLAEPWKYRACVCIIFFLISGTFINFLITLL  
 Rosella MNGTBEINFEVPMNKTGVVRSPEEYPCYLAEPWKYRACVCIIFFLISGTFINFLITLL  
 Emu -----MNGTBEINFEVPMNKTGVVRSPEEYPCYLAEPWKYRACVCIIFFLISGTFINFLITLL

83 86 97

Zebra finch VTEKHKIKRQPLNLYLVNLAADLMAFCFIVTFTYANNGYFVFGVPGVCAVBGFPAATLG  
 Canary VTEKHKIKRQPLNLYLVNLAADLMAFCFIVTFTYANNGYFVFGVPGVCAVBGFPAATLG  
 Chicken VTEKHKIKRQPLNLYLVNLAADLMAFCFIVTFTYANNGYFVFGVPGVCAVBGFPAATLG  
 Pigeon VTEKHKIKRQPLNLYLVNLAADLMAFCFIVTFTYANNGYFVFGVPGVCAVBGFPAATLG  
 Rosella VTEKHKIKRQPLNLYLVNLAADLMAFCFIVTFTYANNGYFVFGVPGVCAVBGFPAATLG  
 Emu -----VTEKHKIKRQPLNLYLVNLAADLMAFCFIVTFTYANNGYFVFGVPGVCAVBGFPAATLG

Zebra finch GQVALWSLVVLAIERYIVICKPFGNFRFNSRHALLVVAATWIIIGVGVATIPFFGWSRYIEEGLQC  
 Canary GQVALWSLVVLAIERYIVICKPFGNFRFNSRHALLVVAATWIIIGVGVATIPFFGWSRYIEEGLQC  
 Chicken GQVALWSLVVLAIERYIVICKPFGNFRFNSRHALLVVAATWIIIGVGVATIPFFGWSRYIEEGLQC  
 Pigeon GQVALWSLVVLAIERYIVICKPFGNFRFNSRHALLVVAATWIIIGVGVATIPFFGWSRYIEEGLQC  
 Rosella GQVALWSLVVLAIERYIVICKPFGNFRFNSRHALLVVAATWIIIGVGVATIPFFGWSRYIEEGLQC  
 Emu -----GQVALWSLVVLAIERYIVICKPFGNFRFNSRHALLVVAATWIIIGVGVATIPFFGWSRYIEEGLQC

Zebra finch EGMQCS CGE DYYTHNDPHNESVYLYMFI IHF IIPVWVIFFS YGRLIKVR BAAQQQES  
 Canary EGMQCS CGE DYYTHNDPHNESVYLYMFI IHF IIPVWVIFFS YGRLIKVR BAAQQQES  
 Chicken EGMQCS CGE DYYTHNDPHNESVYLYMFI IHF IIPVWVIFFS YGRLIKVR BAAQQQES  
 Pigeon EGMQCS CGE DYYTHNDPHNESVYLYMFI IHF IIPVWVIFFS YGRLIKVR BAAQQQES  
 Rosella EGMQCS CGE DYYTHNDPHNESVYLYMFI IHF IIPVWVIFFS YGRLIKVR BAAQQQES  
 Emu -----EGMQCS CGE DYYTHNDPHNESVYLYMFI IHF IIPVWVIFFS YGRLIKVR BAAQQQES

Zebra finch ATTQKAKEVTRMVLMLVGLFPLAWTPYVAWAIPFTNKGDFTATLMSVAFPSKSSSL  
 Canary ATTQKAKEVTRMVLMLVGLFPLAWTPYVAWAIPFTNKGDFTATLMSVAFPSKSSSL  
 Chicken ATTQKAKEVTRMVLMLVGLFPLAWTPYVAWAIPFTNKGDFTATLMSVAFPSKSSSL  
 Pigeon ATTQKAKEVTRMVLMLVGLFPLAWTPYVAWAIPFTNKGDFTATLMSVAFPSKSSSL  
 Rosella ATTQKAKEVTRMVLMLVGLFPLAWTPYVAWAIPFTNKGDFTATLMSVAFPSKSSSL  
 Emu -----ATTQKAKEVTRMVLMLVGLFPLAWTPYVAWAIPFTNKGDFTATLMSVAFPSKSSSL

Zebra finch YNPIIYVIMNKGFRNCMITITICOGKNPFGDEETSSTVSQSKTEVSSVSSSQVSPA  
 Canary YNPIIYVIMNKGFRNCMITITIT-----  
 Chicken YNPIIYVIMNKGFRNCMITITICOGKNPFGDEDSSTVSQSKTEVSSVSSSQVSPA  
 Pigeon YNPIIYVIMNKGFRNCMITITICOGKNPFGDEDSSTVSQSKTEVSSVSSSQVSPA  
 Rosella YNPIIYVIMNKGFRNCMITITICOGKNPFGDEETSSTVSQSKTEVSSVSSSQVSPA  
 Emu -----YNPIIYVIMNKGFRNCMITITICOGKNPFGDEETSSTVSQSKTEVSSVSSSQVSPA

**SWS2 sequences**

Zebra finch MPKP REMDELEDFYI PMSLETPLNTALSPFLVQTHLGSFGPKAMAAFMFLVLLGV  
 Chicken MHPF RPTD-LP EDFYI PMALDAPNITALSPLVQTHLGSFGPKAMAAFMFLVLLGV  
 Pigeon MQRAREARDELDFYI PMALDAPNITALSPLVQTHLGSFGPKAMAAFMFLVLLGV  
 Rosella -----PQTHLGSAGLFAAMAAFMFLVLLGV  
 Emu -----

Zebra finch PINALTICTAKYKLRSHLNYLVNLAANLVLCVGS TTAAYFSQMYFALGPTACKI  
 Chicken PINALTICTARFKLRSHLNYLVNLAANLVLCVGS TTAAYFSQMYFALGPTACKI  
 Pigeon PINALTICTARFKLRSHLNYLVNLAANLVLCVGS TTAAYFSQMYFALGPTACKI  
 Rosella PINALTICTARFKLRSHLNYLVNLAANLVLCVGS TTAAYFSQMYFALGPTACKI  
 Emu -----PINALTICTARFKLRSHLNYLVNLAANLVLCVGS TTAAYFSQMYFALGPTACKI

Zebra finch EGFATLGGMVSLSLAWAFERFLVICKPLGNFTFRGSHAVLGCATWIFGLIASLPL  
 Chicken EGFATLGGMVSLSLAWAFERFLVICKPLGNFTFRGSHAVLGCATWIFGLIASLPL  
 Pigeon EGFATLGGMVSLSLAWAFERFLVICKPLGNFTFRGSHAVLGCATWIFGLIASLPL  
 Rosella EGFATLGGMVSLSLAWAFERFLVICKPLGNFTFRGSHAVLGCATWIFGLIASLPL  
 Emu -----EGMVSLSLAWAFERFLVICKPLGNFTFRGSHAVLGCATWIFGLIASLPL

Zebra finch FGWSRYIIFBGLQCS CGPDWYTVNNHWNNE SVVIFLFCFCGPGVPLTIVFSGYRLLITLRA  
 Chicken FGWSRYIIFBGLQCS CGPDWYTVNNHWNNE SVVIFLFCFCGPGVPLTIVFSGYRLLITLRA  
 Pigeon FGWSRYIIFBGLQCS CGPDWYTVNNHWNNE SVVIFLFCFCGPGVPLTIVFSGYRLLITLRA  
 Rosella FGWSRYIIFBGLQCS CGPDWYTVNNHWNNE SVVIFLFCFCGPGVPLTIVFSGYRLLITLRA  
 Emu -----FGWSRYIIFBGLQCS CGPDWYTVNNHWNNE SVVIFLFCFCGPGVPLTIVFSGYRLLITLRA

269

Zebra finch VARQQEQSASTQKAREVTRMVMVVMVGLFVLCWAPYAFALWVTHRGPFVGLIASIPS  
 Chicken VARQQEQSASTQKAREVTRMVMVVMVGLFVLCWAPYAFALWVTHRGPFVGLIASIPS  
 Pigeon VARQQEQSASTQKAREVTRMVMVVMVGLFVLCWAPYAFALWVTHRGPFVGLIASIPS  
 Rosella VARQQEQSASTQKAREVTRMVMVVMVGLFVLCWAPYAFALWVTHRGPFVGLIASIPS  
 Emu\_SWS2 VARQQEQSASTQKAREVTRMVMVVMVGLFVLCWAPYAFALWVTHRGPFVGLIASIPS

Zebra finch VFSKAS TVNPIIYVFMNKGFRSCMLKLPFCGRS PFGDEEDVSSGSGATQVSSV-SS-  
 Chicken VFSKAS TVNPIIYVFMNKGFRSCMLKLPFCGRS PFGDEEDVSSGSGATQVSSV-SS-  
 Pigeon VFSKAS TVNPIIYVFMNKGFRSCMLKLPFCGRS PFGDEEDVSSGSGATQVSSV-SS-  
 Rosella VFSKAS TVNPIIYVFMNKGFRSCMLKLPFCGRS PFGDEEDVSSGSGATQVSSV-SS-  
 Emu -----VFSKAS TVNPIIYVFMNKGFRS-----

Zebra finch QVSPA  
 Chicken QVSPA  
 Pigeon QVSPA  
 Rosella -----  
 Emu -----

**LWS sequences**

Zebra finch MATGWDGAVFAARRRHEDEDTT RDSIFTYTNNT RGFEGFNHYIAPRWVYNTLSW  
 Canary MATGWDGAVFAARRRHEDEDTT RDSIFTYTNNT RGFEGFNHYIAPRWVYNTLSW  
 Chicken MAAWB-AAFAARRRHEDEDTT RDSVFTYTNNT RGFEGFNHYIAPRWVYNTLSW  
 Pigeon MDGFAAARRRHEDEDTT RDSVFTYTNNT RGFEGFNHYIAPRWVYNTLSW  
 Rosella MAAWB-AVMAARRRHEDEDTT RDSVFTYTNNT RGFEGFNHYIAPRWVYNTLSW  
 Emu -----MAAWB-AVMAARRRHEDEDTT RDSVFTYTNNT RGFEGFNHYIAPRWVYNTLSW

Zebra finch IFVVAASVFTINGLVAVATAKFKLRHPLNWI LVNLAADLGETVIASITSVVQIFGYEYI  
 Canary IFVVAASVFTINGLVAVATAKFKLRHPLNWI LVNLAADLGETVIASITSVVQIFGYEYI  
 Chicken IFVVAASVFTINGLVAVATAKFKLRHPLNWI LVNLAADLGETVIASITSVVQIFGYEYI  
 Pigeon IFVVAASVFTINGLVAVATAKFKLRHPLNWI LVNLAADLGETVIASITSVVQIFGYEYI  
 Rosella IFVVAASVFTINGLVAVATAKFKLRHPLNWI LVNLAADLGETVIASITSVVQIFGYEYI  
 Emu -----IFVVAASVFTINGLVAVATAKFKLRHPLNWI LVNLAADLGETVIASITSVVQIFGYEYI

164

Zebra finch LGHPMVCVIEGYTVSACGI TALWS LAI ISWERWF WCKPFGNIFKFDGLAVAGVLESWWS  
 Canary LGHPMVCVIEGYTVSACGI TALWS LAI ISWERWF WCKPFGNIFKFDGLAVAGVLESWWS  
 Chicken LGHPMVCVIEGYTVSACGI TALWS LAI ISWERWF WCKPFGNIFKFDGLAVAGVLESWWS  
 Pigeon LGHPMVCVIEGYTVSACGI TALWS LAI ISWERWF WCKPFGNIFKFDGLAVAGVLESWWS  
 Rosella LGHPMVCVIEGYTVSACGI TALWS LAI ISWERWF WCKPFGNIFKFDGLAVAGVLESWWS  
 Emu -----LGHPMVCVIEGYTVSACGI TALWS LAI ISWERWF WCKPFGNIFKFDGLAVAGVLESWWS

181

Zebra finch CMTAPPIFGWSRYWPHGLKTS CGPDVFGSS SDPGVQSVMMVLMVTCFFPLAVIIFCYL  
 Canary CMTAPPIFGWSRYWPHGLKTS CGPDVFGSS SDPGVQSVMMVLMVTCFFPLAVIIFCYL  
 Chicken CMTAPPIFGWSRYWPHGLKTS CGPDVFGSS SDPGVQSVMMVLMVTCFFPLAVIIFCYL  
 Pigeon CMTAPPIFGWSRYWPHGLKTS CGPDVFGSS SDPGVQSVMMVLMVTCFFPLAVIIFCYL  
 Rosella CMTAPPIFGWSRYWPHGLKTS CGPDVFGSS SDPGVQSVMMVLMVTCFFPLAVIIFCYL  
 Emu -----CMTAPPIFGWSRYWPHGLKTS CGPDVFGSS SDPGVQSVMMVLMVTCFFPLAVIIFCYL

261 269

Zebra finch QWLAI RAVAAQKES ESTQKAEKVS RMVVMVILAYCFWGEYTFACFAAANFGYAFH  
 Canary QWLAI RAVAAQKES ESTQKAEKVS RMVVMVILAYCFWGEYTFACFAAANFGYAFH  
 Chicken QWLAI RAVAAQKES ESTQKAEKVS RMVVMVILAYCFWGEYTFACFAAANFGYAFH  
 Pigeon QWLAI RAVAAQKES ESTQKAEKVS RMVVMVILAYCFWGEYTFACFAAANFGYAFH  
 Rosella QWLAI RAVAAQKES ESTQKAEKVS RMVVMVILAYCFWGEYTFACFAAANFGYAFH  
 Emu -----QWLAI RAVAAQKES ESTQKAEKVS RMVVMVILAYCFWGEYTFACFAAANFGYAFH

292

Zebra finch PLTAAALPAFFAKSATIYNPIIYVFMNKGFRNICLQLFGKVVDDGSEVSTRTVESSVNS  
 Canary PLTAAALPAFFAKSATIYNPIIYVFMNKGFRNICLQLFGKVVDDGSEVSTRTVESSVNS  
 Chicken PLTAAALPAFFAKSATIYNPIIYVFMNKGFRNICLQLFGKVVDDGSEVSTRTVESSVNS  
 Pigeon PLTAAALPAFFAKSATIYNPIIYVFMNKGFRNICLQLFGKVVDDGSEVSTRTVESSVNS  
 Rosella PLTAAALPAFFAKSATIYNPIIYVFMNKGFRNICLQLFGKVVDDGSEVSTRTVESSVNS  
 Emu -----PLTAAALPAFFAKSATIYNPIIYVFMNKGFRNICLQLFGKVVDDGSEVSTRTVESSVNS

Zebra finch SVS PA  
 Canary SVS PA  
 Chicken SVS PA  
 Pigeon SVS PA  
 Rosella SVS PA  
 Emu -----

**Figure S4.** Alignment of the amino acid sequences of four cone opsins (SWS1, SWS2, RH2 and LWS) expressed in the emu (*Dromaius novaehollandiae*) compared to orthologues found in other bird species, including zebra finch (*Taeniopygia guttata*), canary (*Serinus canaria*), chicken (*Gallus gallus*), pigeon (*Columba livia*), and the crimson rosella (*Platycercus elegans*). Gaps inserted to maintain a high degree of sequence identity and unsequenced regions are indicated by dashes (-). Spectral tuning sites mentioned in the text are highlighted in red.

Zebra finch MNGTEGQDFYVPM SNKTGVVRS PF EY P Q Y Y L A E P W K F S A L A A Y M F M L I L L G F P I N F L T L Y  
Canary -----PFEY P Q Y Y L A E P W K F S A L A A Y M F M L I L L G F P I N F L T L Y  
Chicken MNGTEGQDFYVPM SNKTGVVRS PF EY P Q Y Y L A E P W K F S A L A A Y M F M L I L L G F P V N F L T L Y  
Pigeon MNGTEGQDFYVPM SNKTGVVRS PF EY P Q Y Y L A E P W K F S A L A A Y M F M L I L L G F P V N F L T L Y  
Rosella -----T L Y  
Emu -----P I S N K T G V V R S P F E Y P Q Y Y L A E P W K F S A L A A Y M F M L I L L G F P I N F L T L Y  
Bovine MNGTEGPNFYV P F S N K T G V V R S P F E A P Q Y Y L A E P W Q F S M L A A Y M F L L I M L G F P I N F L T L Y

Zebra finch V T I Q H K K L R T P L N Y I L L N L A V A D L F M V F G G F T T T M Y T S M N G Y F V F G V T G C Y I E G F F A T L G  
Canary V T I Q H K K L R T P L N Y I L L N L A V A D L F M V F G G F T T T M Y T S M N G Y F V F G V T G C Y I E G F F A T L G  
Chicken V T I Q H K K L R T P L N Y I L L N L V A D L F M V F G G F T T T M Y T S M N G Y F V F G V T G C Y I E G F F A T L G  
Pigeon V T I Q H K K L R T P L N Y I L L N L A I A D L F M V F G G F T T T M Y T S M N G Y F V F G V T G C Y I E G F F A T L G  
Rosella V T I Q H K K L R T P L N Y I L L N L A V A D L F M V F G G F T T T M Y T S M N G Y F V F G V T G C Y I E G F F A T L G  
Emu V T I Q H K K L R T P L N Y I L L N L A V A N L F M V F G G F T T T L Y T S M H G Y F V F G V T G C Y I E G F F A T L G  
Bovine V T V Q H K K L R T P L N Y I L L N L A V A D L F M V F G G F T T T L Y T S L H G Y F V F G P T G C N L E G F F A T L G

Zebra finch G E I A L W S L V V L A I E R Y V V V C K P M S N F R F G E N H A I M G V A F S W I M A L A C A A P P L F G W S R Y I P  
Canary G E I A L W S L V V L A I E R Y V V V C K P M S N F R F G E N H A I M G V A F S W I M A L A C A A P P L F G W S R Y I P  
Chicken G E I A L W S L V V L A E R Y V V V C K P M S N F R F G E N H A I M G V A F S W I M A M A C A A P P L F G W S R Y I P  
Pigeon G E I A L W S L V V L A I E R Y V V V C K P M S N F R F G E N H A I M G V A F S W M A L A C A A P P L F G W S R Y I P  
Rosella G E I A L W S L V V L A I E R Y V V V C K P M S N F R F G E N H A I M G V A F S W I M A L A C A A P P L F G W S R Y I P  
Emu G E I A L W S L V V L A I E R Y V V V C K P V S N F R F G E N H A I M G L A L T W M A L A C A A P P L F G W S R Y I P  
Bovine G E I A L W S L V V L A I E R Y V V V C K P M S N F R F G E N H A I M G V A F T W M A L A C A A P P L V G W S R Y I P

Zebra finch E G M Q C S C G I D Y Y T L K P E V N N E S F V I Y M F V V H F M I P L S I I F F C Y G N L V C T V K E A A A Q Q Q E S  
Canary E G M Q C S C G I D Y Y T L K P E V N N E S F V I Y M F V V H F M I P L L I I F F C Y G N L V C T V K E A A A Q Q Q E S  
Chicken E G M Q C S C G I D Y Y T L K P E I N N E S F V I Y M F V V H F M I P L A V I F F C Y G N L V C T V K E A A A Q Q Q E S  
Pigeon E G M Q C S C G I D Y Y T L K P E I N N E S F V I Y M F V V H F M I P L M V I F F C Y G N L V C T V K E A A A Q Q Q E S  
Rosella E G M Q C S C G I D Y Y T L K P E I N N E S F V I Y M F V V H F M I P L M I I F F C Y G N L V C T V K E A A A Q Q Q E S  
Emu E G M Q C S C G I D Y Y T L K P E V N N E S F V I Y M F V V H F T I P L M V I F F C Y G N L V C T V K E A A A Q Q Q E S  
Bovine E G M Q C S C G I D Y Y T P H E E T N N E S F V I Y M F V V H F I I P L I V I F F C Y G Q L V F T V K E A A A Q Q Q E S

Zebra finch A T T Q K A E K E V T R M V I I M V I A F L I C W V P Y A S V A F Y I F T N Q G S D F G P I F M T I P A F F A K S S A I  
Canary A T T Q K A E K E V T R M V I I M V I S F L I C W V P Y A S V A F Y I F T N Q G S D F G P I F M T I P A F F A K S S A I  
Chicken A T T Q K A E K E V T R M V I I M V I A F L I C W V P Y A S V A F Y I F T N Q G S D F G P I F M T I P A F F A K S S A I  
Pigeon A T T Q K A E K E V T R M V I I M V I A F L I C W L P Y A S V A F Y I F T N Q G S D F G P I F M T I P A F F A K S S A I  
Rosella A T T Q K A E K E V T R M V I I M V I A F L I C W V P Y A S V A F Y I F T N Q G S D F G P I F M T I P A F F A K S S S I  
Emu A T T Q K A E K E V T R M V I M V I A F L I C W L P Y A S V A F Y I F T N Q G S D F G P I F M T I P A F F A K S S A I  
Bovine A T T Q K A E K E V T R M V I I M V I A F L I C W L P Y A G V A F Y I F T H Q G S D F G P I F M T I P A F F A K T S A V

Zebra finch Y N P V I Y I V M N K Q F R N C M I T T L C C G K N P L G D E D T S A G K T E T S S V S T S Q V S P A  
Canary Y N P V I Y I V M N K Q F R N C M I T T L C C G K N P L G D E D T S A G K T E T S S -----  
Chicken Y N P V I Y I V M N K Q F R N C M I T T L C C G K N P L G D E D T S A G K T E T S S V S T S Q V S P A  
Pigeon Y N P V I Y I V M N K Q F R N C M I T T L C C G K N P L G D E D T S A G K T E T S S V S T S Q V S P A  
Rosella F N P L I Y V F R D K Q F R N C M I T T L C C G K N P L G D E D T S A G K T E T S S V S T S Q V S P A  
Emu Y N P V I Y I V M N K Q F R N C M I -----  
Bovine Y N P V I Y I M M N K O F R N C M V T T L C C G K N P L G D E A S T --- T V S K T E T S O V A P A

**Figure S5.** Alignment of the amino acid sequences of the emu (*Dromaius novaehollandiae*) rod opsin (RH1) compared to orthologues found in other bird species, including zebra finch (*Taeniopygia guttata*), canary (*Serinus canaria*), chicken (*Gallus gallus*), pigeon (*Columba livia*), and the crimson rosella (*Platycercus elegans*), as well as the common cow (*Bos taurus*). Gaps inserted to maintain a high degree of sequence identity and unsequenced regions are indicated by dashes (–). Spectral tuning sites mentioned in the text are highlighted in red.

**Supplementary Tables:****Table S1.** Primers used to isolate and amplify emu opsin gene sequences from retinal cDNA.

| <b>Primer</b> | <b>Sequence</b>                |
|---------------|--------------------------------|
| LWS_F1        | AAGCGTATTYAYTTAYACCRACASCAACAA |
| LWS_R1        | CATCCTBGACACYTCCYTCTCVGCCTTCTG |
| LWS_F2        | AGTGTCATCAACCAGWTCTYBGGSTAYTTC |
| LWS_R2        | CATCATCCACYTTYTTSCCRAASAGCTGCA |
| SWS1_F1       | TCCCATGTCCGGAGAVGAVGABTTYTACCT |
| SWS1_R1       | CACCACSACCATSCGVGASACCTCCCGCTC |
| SWS1_F2       | GGCCTTCGARGHTACATYGYATCTGCAA   |
| SWS1_R2       | TTAGCTGGGGCYGACYTGRCTGGAGGACAC |
| SWS2_F1       | CAACATCACRRCSTSAGCCCBTTCTGGT   |
| SWS2_R1       | CAGGAAGCCCADSACCATSACYACYACCAT |
| SWS2_F2       | CTGCAAGATAGAGGGNTTYDCBGCMACGCT |
| SWS2_R2       | AAGAATTTTABGCBGGGGMSACBTGGCTGG |
| RH2_F1        | ATCAACATCCTCACCYTVYTKGTSACCTTC |
| RH2_R1        | CAAGGAGGAATCCMADCACCATSARRATCA |
| RH2_F2        | CTTCTCTGCCACTCAYGCCWTRWTRGGCAT |
| RH2_R2        | CACTTGGCTGGAAGARAYRGAVGAKACCTC |
| RH1_F1        | GTCAAAAATTTCTAYRTBCCCWTKCCAACA |
| RH1_R1        | ACAGTGCAGACAAGRYKYCCRTAGCAGAAG |
| RH1_F2        | AATAGGATGCWRCWTYGARGGCTTCTTTGC |
| RH1_R2        | ATTCTTTCCACARCARAGRGTBRTGATCAT |



**Table S2.** Spectral absorption characteristics of retinal photoreceptors in the emu measured using MSP.  $\lambda_{\max}$ , wavelength of maximum absorbance/absorbance change;  $\lambda_{\text{cut}}$ , cut-off wavelength;  $\lambda_{\text{mid}}$ , wavelength of half maximum absorbance. Values are  $\pm 1$  standard deviation. Avian rods do not contain oil droplets and no oil droplets were observed in the accessory members of double cones in the emu (although a diffuse pigmentation was present). T-, C-, Y-, R- and P-type oil droplets are located in the UVS, SWS, MWS and LWS single cones, and the principal members of the LWS double cones, respectively. D, dorsal retina; V, ventral retina; N, number of cells used in the analysis. Subscripts 1 and 2 identify two different spectral types of P-type oil droplet located in the dorsal retina.

| Visual Pigments                                   | Single Cones      |                   |                   |                   | Double Cones      |                   |                   |  | Rods |  |
|---------------------------------------------------|-------------------|-------------------|-------------------|-------------------|-------------------|-------------------|-------------------|--|------|--|
|                                                   | UVS               | SWS               | MWS               | LWS               | Principal         | Accessory         |                   |  |      |  |
| Mean $\lambda_{\max}$ of prebleach spectra (nm)   | 367.0 $\pm$ 2.5   | 453.2 $\pm$ 2.3   | 502.3 $\pm$ 2.8   | 562.0 $\pm$ 2.0   | 562.8 $\pm$ 2.6   | 563.4 $\pm$ 2.0   | 501.0 $\pm$ 1.0   |  |      |  |
| $\lambda_{\max}$ of mean prebleach spectrum (nm)  | 366.8             | 453.1             | 501.2             | 562.0             | 562.9             | 562.1             | 500.7             |  |      |  |
| Mean transverse absorbance at $\lambda_{\max}$    | 0.018 $\pm$ 0.008 | 0.012 $\pm$ 0.003 | 0.016 $\pm$ 0.005 | 0.018 $\pm$ 0.004 | 0.013 $\pm$ 0.004 | 0.012 $\pm$ 0.003 | 0.023 $\pm$ 0.004 |  |      |  |
| Mean $\lambda_{\max}$ of difference spectra (nm)  | 366.6 $\pm$ 6.8   | 453.7 $\pm$ 3.5   | 507.2 $\pm$ 4.0   | 564.2 $\pm$ 1.9   | 562.8 $\pm$ 2.8   | 563.5 $\pm$ 2.3   | 504.0 $\pm$ 1.7   |  |      |  |
| $\lambda_{\max}$ of mean difference spectrum (nm) | 366.5             | 454.0             | 507.0             | 564.0             | 563.0             | 563.7             | 503.5             |  |      |  |
| N prebleach (difference)                          | 9 (8)             | 9 (13)            | 21 (25)           | 10 (14)           | 12 (12)           | 7 (8)             | 21 (22)           |  |      |  |

  

| Oil Droplets                                            | T-type          |                 | C-type          |                 | Y-type          |                 | R-type          |                 | P-type          |                  |                 | A-type          |                 |   |
|---------------------------------------------------------|-----------------|-----------------|-----------------|-----------------|-----------------|-----------------|-----------------|-----------------|-----------------|------------------|-----------------|-----------------|-----------------|---|
|                                                         | D               | V               | D               | V               | D               | V               | D               | V               | D <sub>1</sub>  | D <sub>2</sub>   | V               | D               | V               |   |
| Mean $\lambda_{\text{cut}}$ of absorbance spectra (nm)  | -               | -               | 408.4 $\pm$ 4.3 | 408.5 $\pm$ 3.5 | 508.1 $\pm$ 1.9 | 507.0 $\pm$ 4.0 | 558.8 $\pm$ 3.8 | 559.9 $\pm$ 4.2 | 404.0 $\pm$ 2.0 | 475.9 $\pm$ 11.8 | 491.1 $\pm$ 3.8 | 480.2 $\pm$ 3.9 | 479.5 $\pm$ 2.0 | - |
| $\lambda_{\text{cut}}$ of mean absorbance spectrum (nm) | -               | -               | 409.3           | 407.5           | 507.6           | 506.8           | 559.2           | 560.6           | 403.5           | 479.2            | 492.3           | 479.2           | 480.1           | - |
| Mean $\lambda_{\text{mid}}$ of absorbance spectra (nm)  | -               | -               | 426.0 $\pm$ 1.9 | 432.0 $\pm$ 4.9 | 524.6 $\pm$ 3.4 | 526.8 $\pm$ 4.2 | 580.9 $\pm$ 3.8 | 582.2 $\pm$ 4.2 | 433.5 $\pm$ 5.9 | 499.1 $\pm$ 6.2  | 507.4 $\pm$ 2.3 | 494.4 $\pm$ 3.5 | 491.9 $\pm$ 0.6 | - |
| $\lambda_{\text{mid}}$ of mean absorbance spectrum (nm) | -               | -               | 426.2           | 430.9           | 524.3           | 527.3           | 581.4           | 582.8           | 432.9           | 500.6            | 508.1           | 494.6           | 492.1           | - |
| Mean maximum absorbance                                 | 0.04 $\pm$ 0.02 | 0.05 $\pm$ 0.03 | 0.54 $\pm$ 0.09 | 0.47 $\pm$ 0.11 | 0.84 $\pm$ 0.08 | 0.84 $\pm$ 0.06 | 0.85 $\pm$ 0.08 | 0.83 $\pm$ 0.08 | 0.46 $\pm$ 0.10 | 0.66 $\pm$ 0.14  | 0.58 $\pm$ 0.10 | 0.21 $\pm$ 0.13 | 0.20 $\pm$ 0.08 | - |
| Mean diameter ( $\mu\text{m}$ )                         | 2.4 $\pm$ 0.2   | 3.0 $\pm$ 0.4   | 3.3 $\pm$ 0.8   | 3.7 $\pm$ 0.6   | 3.3 $\pm$ 0.6   | 3.6 $\pm$ 0.4   | 3.2 $\pm$ 0.3   | 3.5 $\pm$ 0.5   | 2.8 $\pm$ 0.3   | 3.1 $\pm$ 0.3    | 3.1 $\pm$ 0.4   | -               | -               | - |
| N                                                       | 5               | 4               | 12              | 11              | 18              | 22              | 13              | 19              | 13              | 11               | 20              | 9               | 7               | - |

**Table S3.** Amino acid differences between ultraviolet-sensitive (UVS) and violet-sensitive (VS) short-wavelength-sensitive-1 (SWS1) visual pigments at known or potential tuning sites, including residues 46, 49, 52, 114 and 118 [1]; 261, 269 and 292 [2]; 86 and 90 [3, 4]; and 93 [5]. Sequence data for avian SWS1 pigments are derived from this study and published articles [6-13], and are compared to residues found in the green anole (*Anolis carolinensis*) SWS1 pigment (GenBank Accession Number AH007736).

| Pigment   | Tuning sites      |                   |     |            |     |            |            |            |     |     |     |     |
|-----------|-------------------|-------------------|-----|------------|-----|------------|------------|------------|-----|-----|-----|-----|
|           | 46                | 49                | 52  | 86         | 90  | 93         | 114        | 118        | 164 | 261 | 269 | 292 |
| Avian UVS | Phe<br>Leu<br>Val | Leu<br>Met<br>Val | Thr | Ala<br>Cys | Cys | Thr        | Gly        | Ala        | Gly | Phe | Ala | Ala |
| Avian VS  | Phe<br>Ile        | Ala<br>Leu        | Thr | Cys<br>Ser | Ser | Thr<br>Val | Ala<br>Gly | Ala<br>Thr | Gly | Phe | Ala | Ala |
| Anole UVS | Phe               | Phe               | Thr | Phe        | Ser | Thr        | Ala        | Ser        | Gly | Phe | Ala | Ala |
| Emu UVS   | Phe               | Phe               | Thr | Phe        | Cys | Met        | Gly        | Ser        | Gly | Phe | Ala | Ala |

#### Supplementary References (for Table S3):

- [1] Shi, Y., Radlwimmer, F.B. & Yokoyama, S. 2001 Molecular genetics and the evolution of ultraviolet vision in vertebrates. *Proc. Natl. Acad. Sci. U S A* **98**, 11731-11736. (doi:10.1073/pnas.201257398).
- [2] Yokoyama, S. & Radlwimmer, F.B. 1998 The "five-sites" rule and the evolution of red and green color vision in mammals. *Mol. Biol. Evol.* **15**, 560-567.
- [3] Cowing, J.A., Poopalasundaram, S., Wilkie, S.E., Robinson, P.R., Bowmaker, J.K. & Hunt, D.M. 2002 The molecular mechanism for the spectral shifts between vertebrate ultraviolet- and violet-sensitive cone visual pigments. *Biochem. J.* **367**, 129-135. (doi:10.1042/BJ20020483).
- [4] Wilkie, S.E., Robinson, P.R., Cronin, T.W., Poopalasundaram, S., Bowmaker, J.K. & Hunt, D.M. 2000 Spectral tuning of avian violet- and ultraviolet-sensitive visual pigments. *Biochemistry* **39**, 7895-7901. (doi:10.1021/bi992776m).
- [5] Carvalho, L.S., Davies, W.L., Robinson, P.R. & Hunt, D.M. 2012 Spectral tuning and evolution of primate short-wavelength-sensitive visual pigments. *Proc. R. Soc. Lond. B* **279**, 387-393. (doi:10.1098/rspb.2011.0782).
- [6] Aidala, Z., Huynen, L., Brennan, P.L., Musser, J., Fidler, A., Chong, N., Machovsky Capuska, G.E., Anderson, M.G., Talaba, A., Lambert, D., et al. 2012 Ultraviolet visual sensitivity in three avian lineages: paleognaths, parrots, and passerines. *J. Comp. Physiol. A* **198**, 495-510. (doi:10.1007/s00359-012-0724-3).
- [7] Carvalho, L.S., Cowing, J.A., Wilkie, S.E., Bowmaker, J.K. & Hunt, D.M. 2007 The molecular evolution of avian ultraviolet- and violet-sensitive visual pigments. *Mol. Biol. Evol.* **24**, 1843-1852. (doi:10.1093/molbev/msm109).

- [8] Knott, B., Davies, W.I., Carvalho, L.S., Berg, M.L., Buchanan, K.L., Bowmaker, J.K., Bennett, A.T. & Hunt, D.M. 2013 How parrots see their colours: novelty in the visual pigments of *Platyercus elegans*. *J. Exp. Biol.* **216**, 4454-4461. (doi:10.1242/jeb.094136).
- [9] Odeen, A. & Hastad, O. 2010 Pollinating birds differ in spectral sensitivity. *J. Comp. Physiol. A* **196**, 91-96. (doi:10.1007/s00359-009-0474-z).
- [10] Odeen, A. & Hastad, O. 2013 The phylogenetic distribution of ultraviolet sensitivity in birds. *BMC Evol. Biol.* **13**, 36. (doi:10.1186/1471-2148-13-36).
- [11] Ödeen, A. & Håstad, O. 2003 Complex distribution of avian color vision systems revealed by sequencing the SWS1 opsin from total DNA. *Mol. Biol. Evol.* **20**, 855-861. (doi:10.1093/molbev/msg108).
- [12] Odeen, A., Hastad, O. & Alstrom, P. 2010 Evolution of ultraviolet vision in shorebirds (Charadriiformes). *Biol. Lett.* **6**, 370-374. (doi:10.1098/rsbl.2009.0877).
- [13] Odeen, A., Hastad, O. & Alstrom, P. 2011 Evolution of ultraviolet vision in the largest avian radiation - the passerines. *BMC Evol. Biol.* **11**, 313. (doi:10.1186/1471-2148-11-313).
